# Supplementary material for: Molecular prevalence and genotyping of Chlamydia spp. in wild birds from South Korea
Source: PubMed Central journal article supplement — J Vet Med Sci. 2017 Jun 2;79(7):1204–9. doi: 10.1292/jvms.16-0516 (PMC5559364; doi:10.1292/jvms.16-0516), 2017-06-02
Supplement: jvms-79-1204-s001.pdf [file jvms-79-1204-s001.pdf]

## Supporting Information

**Supplemental Table 1.** *Chlamydia* spp. infection in wild birds from South Korea

| Order           | No. of samples | Positive of order (%) | Species(Scientific name)                                   | No. of samples tested | No. of <i>C. psittaci</i> positive birds(name) | No. of <i>C. gallinacea</i> positive birds(name) |
|-----------------|----------------|-----------------------|------------------------------------------------------------|-----------------------|------------------------------------------------|--------------------------------------------------|
| Anseriformes    | 7              | 0                     | White-fronted goose( <i>Anser albifrons</i> )              | 1                     |                                                |                                                  |
|                 |                |                       | Green-winged teal( <i>Anas crecca</i> )                    | 1                     |                                                |                                                  |
|                 |                |                       | Mallard( <i>Anas platyrhynchos</i> )                       | 1                     |                                                |                                                  |
|                 |                |                       | Falcated teal( <i>Anas falcata</i> )                       | 1                     |                                                |                                                  |
|                 |                |                       | Spot-billed duck( <i>Anas poecilorhyncha</i> )             | 3                     |                                                |                                                  |
| Charadriiformes | 13             | 2 (15.4)              | Black-tailed gull( <i>Larus crassirostris</i> )            | 6                     |                                                | 2 (nier-A94 and -A186)                           |
|                 |                |                       | <b>Woodcock(<i>Scolopax rusticola</i>)</b>                 | 3                     |                                                |                                                  |
|                 |                |                       | Herring gull( <i>Larus argentatus</i> )                    | 4                     |                                                |                                                  |
|                 |                |                       |                                                            |                       |                                                |                                                  |
| Ciconiiformes   | 30             | 0                     | Great egret( <i>Ardea alba</i> )                           | 1                     |                                                |                                                  |
|                 |                |                       | Little egret( <i>Egretta garzetta</i> )                    | 3                     |                                                |                                                  |
|                 |                |                       | Gray heron( <i>Ardea cinerea</i> )                         | 12                    |                                                |                                                  |
|                 |                |                       | Large egret( <i>Egretta alba modesta</i> )                 | 3                     |                                                |                                                  |
|                 |                |                       | Intermediate egret( <i>Mesophoyx intermedia</i> )          | 3                     |                                                |                                                  |
|                 |                |                       | Black-crowned night heron( <i>Nycticorax nycticorax</i> )  | 6                     |                                                |                                                  |
|                 |                |                       | Cattle egret( <i>Bubulcus ibis</i> )                       | 2                     |                                                |                                                  |
|                 |                |                       |                                                            |                       |                                                |                                                  |
| Columbiformes   | 36             | 1 (2.8)               | Rufous turtle dove( <i>Streptopelia orientalis</i> )       | 23                    |                                                |                                                  |
|                 |                |                       | Rock dove( <i>Columba rupestris</i> )                      | 2                     |                                                |                                                  |
|                 |                |                       | <b>Domestic pigeon(<i>Columba livia var.domestica</i>)</b> | 11                    | 1(nier-A124)                                   |                                                  |
| Coraciiformes   | 6              | 0                     | Broad-billed roller( <i>Eurystomus orientalis</i> )        | 4                     |                                                |                                                  |
|                 |                |                       | Ruddy kingfisher( <i>Halcyon coromanda</i> )               | 2                     |                                                |                                                  |
| Falconiformes   | 17             | 0                     | Common buzzard( <i>Buteo buteo</i> )                       | 15                    |                                                |                                                  |
|                 |                |                       | Hobby( <i>Falco subbuteo</i> )                             | 2                     |                                                |                                                  |
| Galliformes     | 6              | 0                     | Ring-necked pheasant( <i>Phasianus colchicus</i> )         | 6                     |                                                |                                                  |
| Gaviiformes     | 1              | 0                     | Pacific diver( <i>Gavia pacifica</i> )                     | 1                     |                                                |                                                  |
| Gruiformes      | 4              | 0                     | Coot( <i>Fulica atra</i> )                                 | 4                     |                                                |                                                  |
| Passeriformes   | 83             | 3 (3.6)               | Dusky thrush( <i>Turdus naumanni eunomus</i> )             | 1                     |                                                |                                                  |
|                 |                |                       | <b>Korean Magpie(<i>Pica picasERICA</i>)</b>               | 35                    | 1(nier-A101)                                   |                                                  |

|                |            |                |                                                        |            |                        |
|----------------|------------|----------------|--------------------------------------------------------|------------|------------------------|
|                |            |                | Carrion crow( <i>Corvus corone orientalis</i> )        | 2          |                        |
|                |            |                | <b>Rook(<i>Corvus frugilegus</i>)</b>                  | <b>6</b>   | 2(nier-A97, nier-A113) |
|                |            |                | Black-neaped oriole( <i>Oriolus chinensis</i> )        | 1          |                        |
|                |            |                | Jay( <i>Garrulus glandarius</i> )                      | 13         |                        |
|                |            |                | Yellow-billed grosbeak( <i>Eophona migratoria</i> )    | 1          |                        |
|                |            |                | Brown-eared bulbul( <i>Hypsipetes amaurotis</i> )      | 13         |                        |
|                |            |                | Gray starling( <i>Sturnus cineraceus</i> )             | 2          |                        |
|                |            |                | Jungle crow( <i>Corvus macrorhynchos</i> )             | 2          |                        |
|                |            |                | White's ground thrush( <i>Zoothera dauma</i> )         | 5          |                        |
|                |            |                | Pale thrush( <i>Turdus pallidus</i> )                  | 2          |                        |
| Piciformes     | 11         | 0              | Woodpecker( <i>Picidae</i> )                           | 1          |                        |
|                |            |                | Grey-headed woodpecker( <i>Picus canus</i> )           | 6          |                        |
|                |            |                | White-backed woodpecker( <i>Dendrocopos leucotos</i> ) | 4          |                        |
| Podicipiformes | 7          | 0              | Great crested grebe( <i>Podiceps cristatus</i> )       | 7          |                        |
| Strigiformes   | 2          | 0              | Jungle nightjar( <i>Caprimulgus indicus</i> )          | 2          |                        |
| Upupiformes    | 2          | 0              | Hoopoe( <i>Upupa epops saturata</i> )                  | 2          |                        |
| <b>Total</b>   | <b>225</b> | <b>6 (2.7)</b> |                                                        | <b>225</b> |                        |
